# Supplementary material
Source: publisher figshare collection journal article supplement (https://gsapubs.figshare.com/ndownloader/files/22757627)
Supplement: Supplementary file 1 [file 22757627]

### Data Repository Item 1: Analytical Methods used in U-Pb Geochronology

Zircon was separated from bulk rock samples by standard crushing, heavy liquid, and magnetic separation techniques, and was handpicked using a binocular microscope with selection based on clarity and crystal morphology. To minimize the effects of Pb-loss in zircon, grains were pre-treated using thermal annealing and chemical leaching (chemical abrasion or CA-TIMS technique: Mattinson, 2005) designed to preferentially remove the high-U parts of the zircon crystal that are most susceptible to Pb-loss. Annealing took place inside a furnace at 900°C for 60 hours. The annealed grains were loaded into 200µl FEP Teflon® microcapsules and leached in 29M HF at 180°C in high-pressure Parr® vessels for 12 hours. The partially dissolved sample was then transferred into 3ml Savillex® FEP beakers, fluxed with 4N HNO<sub>3</sub> on a hot plate, placed in an ultrasonic bath, and thoroughly rinsed with several millilitres of ultra-pure water. The grains were then loaded back into their microcapsules, spiked with a mixed <sup>205</sup>Pb-<sup>233</sup>U-<sup>235</sup>U tracer solution, and dissolved completely in 29M HF at 210°C for 48 hours.

Dissolved Pb and U were chemically separated using a miniaturized HCl-based ion-exchange chromatography procedure modified after Krogh (1973), using 50 ml columns of AG1x8 anion-exchange resin. The FEP dissolution vessels were cleaned in between analyses in four consecutive steps using concentrated HF and 6N HCl solutions at dissolution temperatures over a period of four days.

Both Pb and U were loaded with a silica gel - H<sub>3</sub>PO<sub>4</sub> emitter solution (Gerstenberger and Haase, 1997) on single degassed Re filaments and their isotopic compositions were measured on the VG Sector 54 multi-collector thermal ionization mass spectrometer at MIT. Lead isotopic measurements were made in a peak-switching mode by ion counting using a Daly photomultiplier detector with a <sup>206</sup>Pb ion beam intensity of 0.5 to 2.0 x 10<sup>-13</sup> amps usually maintained during data acquisition. Uranium isotopes were measured as oxide ions on three Faraday detectors in a static mode with an average <sup>235</sup>U<sup>16</sup>O<sub>2</sub><sup>+</sup> ion-beam intensity of 1.0 x 10<sup>-12</sup> Amps.

Measured isotopic ratios were corrected for mass-dependant isotope fractionation in the mass spectrometer, as well as for U and Pb contributions from the spike and laboratory procedural blanks.

### References

- Gerstenberger, H. and Haase, G., 1997, A highly effective emitter substance for mass spectrometric Pb isotope ratio determinations: *Chemical Geology*: v.136, n. 3-4, p. 309-312.
- Jaffey, A.H., Flynn, K.F., Glendenin, L.E., Bentley, W.C. and Essling, A.M., 1971, Precision measurements of half-lives and specific activities of <sup>235</sup>U and <sup>238</sup>U. *Physical Reviews C*, v. 4, p. 1889-1906.
- Krogh, T. E., 1973, A low contamination method for hydrothermal decomposition of zircon and extraction of U and Pb for isotopic age determination: *Geochimica et Cosmochimica Acta*, v. 37, p. 485-494.
- Ludwig, K.R., 1980, Calculation of uncertainties of U-Pb isotopic age data: *Earth and Planetary Science Letters*, v. 46, p. 212-220.
- Mattinson, J.M., 2005, Zircon U-Pb chemical abrasion (CA-TIMS) method: Combined annealing and multi-step partial dissolution analysis for improved precision and accuracy of zircon ages: *Chemical Geology*, v. 220 p. 47-66.

Table DR1. U-Pb isotopic data.

| Sample | $\frac{\text{Pb}^*}{\text{Pb}_c}$ | $\text{Pb}_c$<br>(pg) | $\frac{\text{Th}}{\text{U}}$ | Isotopic ratios                           |                                           |                                          |       |                                          |       |                                           |       |                | Dates (Ma)                               |      |                                          |      |                                           |      |         |
|--------|-----------------------------------|-----------------------|------------------------------|-------------------------------------------|-------------------------------------------|------------------------------------------|-------|------------------------------------------|-------|-------------------------------------------|-------|----------------|------------------------------------------|------|------------------------------------------|------|-------------------------------------------|------|---------|
|        |                                   |                       |                              | $\frac{^{206}\text{Pb}}{^{204}\text{Pb}}$ | $\frac{^{208}\text{Pb}}{^{206}\text{Pb}}$ | $\frac{^{206}\text{Pb}}{^{238}\text{U}}$ | % err | $\frac{^{207}\text{Pb}}{^{235}\text{U}}$ | % err | $\frac{^{207}\text{Pb}}{^{206}\text{Pb}}$ | % err | corr.<br>coef. | $\frac{^{206}\text{Pb}}{^{238}\text{U}}$ | ±    | $\frac{^{207}\text{Pb}}{^{235}\text{U}}$ | ±    | $\frac{^{207}\text{Pb}}{^{206}\text{Pb}}$ | ±    | % disc. |
| (a)    | (b)                               | (c)                   | (d)                          | (e)                                       | (f)                                       | (f)                                      | (g)   | (f)                                      | (g)   | (f)                                       | (g)   |                | (h)                                      | (i)  | (h)                                      | (i)  | (h)                                       | (i)  | (j)     |
| z1     | 58                                | 0.91                  | 0.57                         | 3485                                      | 0.183                                     | 0.036486                                 | 0.08  | 0.255849                                 | 0.14  | 0.050857                                  | 0.11  | 0.60           | 231.02                                   | 0.18 | 231.32                                   | 0.29 | 234.40                                    | 2.58 | 1.44    |
| z3     | 108                               | 0.44                  | 0.59                         | 6396                                      | 0.188                                     | 0.036479                                 | 0.06  | 0.255540                                 | 0.12  | 0.050806                                  | 0.10  | 0.50           | 230.97                                   | 0.13 | 231.07                                   | 0.25 | 232.00                                    | 2.37 | 0.44    |
| z4     | 75                                | 0.86                  | 0.61                         | 4441                                      | 0.196                                     | 0.036467                                 | 0.06  | 0.255689                                 | 0.12  | 0.050852                                  | 0.09  | 0.58           | 230.90                                   | 0.15 | 231.19                                   | 0.24 | 234.16                                    | 2.19 | 1.40    |
| z5     | 27                                | 0.42                  | 0.40                         | 1689                                      | 0.130                                     | 0.036480                                 | 0.13  | 0.255985                                 | 0.29  | 0.050893                                  | 0.24  | 0.53           | 230.98                                   | 0.30 | 231.43                                   | 0.59 | 236.00                                    | 5.62 | 2.13    |
| z6     | 38                                | 0.56                  | 0.58                         | 2258                                      | 0.189                                     | 0.036466                                 | 0.09  | 0.255986                                 | 0.23  | 0.050913                                  | 0.20  | 0.48           | 230.89                                   | 0.21 | 231.43                                   | 0.47 | 236.88                                    | 4.65 | 2.53    |
| z10    | 135                               | 0.41                  | 0.62                         | 7928                                      | 0.198                                     | 0.036466                                 | 0.05  | 0.255561                                 | 0.08  | 0.050828                                  | 0.07  | 0.63           | 230.89                                   | 0.12 | 231.08                                   | 0.17 | 233.04                                    | 1.51 | 0.92    |
| z11    | 49                                | 0.33                  | 0.47                         | 3032                                      | 0.152                                     | 0.036461                                 | 0.08  | 0.255774                                 | 0.16  | 0.050878                                  | 0.14  | 0.51           | 230.86                                   | 0.17 | 231.26                                   | 0.34 | 235.28                                    | 3.22 | 1.88    |
| z12    | 57                                | 0.88                  | 0.64                         | 3377                                      | 0.203                                     | 0.036453                                 | 0.07  | 0.255332                                 | 0.10  | 0.050800                                  | 0.07  | 0.70           | 230.81                                   | 0.16 | 230.90                                   | 0.21 | 231.76                                    | 1.70 | 0.41    |

(a) z1, z2 etc. are single grains of zircon; (b) Ratio of radiogenic Pb to common Pb; (c) Total weight of common Pb; (d) Model Th/U ratio calculated from radiogenic  $^{208}\text{Pb}/^{206}\text{Pb}$  ratio and  $^{207}\text{Pb}/^{206}\text{Pb}$  age; (e) Measured ratio corrected for spike and fractionation only. Mass fractionation corrections were based on analysis of NBS-981 and NBS-983. Corrections of  $0.25 \pm 0.04\%$ /amu (atomic mass unit) were applied to single-collector Pb Daly analyses; (f) Corrected for fractionation, spike, blank, and initial common Pb. All common Pb was assumed to be procedural blank; (g) Errors are  $2\sigma$ , propagated using the algorithms of Ludwig (1980); (h) Calculations are based on the decay constants of Jaffey et al. (1971); (i) Errors are  $2\sigma$ ; (j) % discordance =  $100 - (100 \times ^{206}\text{Pb}/^{238}\text{U} \text{ date} / ^{207}\text{Pb}/^{206}\text{Pb} \text{ date})$ .
